# Supplementary material
Source: Elsevier journal article supplement (https://www.sciencedirect.com/science/article/pii/S2529993X18302533)
Supplement: mmc2 [file S2529993X18302533:mmc2.pdf]

**DATOS ENCUESTA PRE-PARE ESTUDIANTES: n=441, (%)**

|                                                                                                                                                                               | No se proporcionó docencia | 1. No preparado del todo | 2    | 3    | 4. Suficientemente preparado | 5    | 6    | 7 Muy bien preparado | No estoy seguro | No entiendo la pregunta |
|-------------------------------------------------------------------------------------------------------------------------------------------------------------------------------|----------------------------|--------------------------|------|------|------------------------------|------|------|----------------------|-----------------|-------------------------|
| 1.a Reconocer signos clínicos de infección                                                                                                                                    | 0                          | 0,9                      | 1,1  | 2,9  | 16,6                         | 13,4 | 30,6 | 34,2                 | 0,2             | 0                       |
| 1.b Evaluar la gravedad de la infección (usando criterios como los de shock séptico).                                                                                         | 0                          | 2                        | 2,9  | 12,2 | 23,8                         | 20   | 24   | 13,4                 | 1,1             | 0,2                     |
| 1.c Usar pruebas diagnósticas rápidas en el lugar de atención al paciente (p.ej. tiras de orina, determinación de antígeno estreptocócico)                                    | 3,9                        | 7                        | 10,2 | 16,6 | 24                           | 12,5 | 16,1 | 8,2                  | 0,9             | 0,2                     |
| 1.d Interpretar marcadores de inflamación (p. ej. PCR)                                                                                                                        | 0,5                        | 1,1                      | 3,2  | 8,2  | 21,3                         | 18,6 | 27   | 19,7                 | 0,2             | 0,5                     |
| 1.e Decidir sobre la toma de muestras microbiológicas antes de empezar el tratamiento antibiótico                                                                             | 0,2                        | 1,4                      | 7,5  | 11,6 | 19,7                         | 19,5 | 21,1 | 17,9                 | 1,1             | 0,2                     |
| 1.f Interpretar pruebas microbiológicas básicas (resultado de hemocultivos, antibiograma)                                                                                     | 0,7                        | 1,6                      | 6,3  | 11,3 | 22,4                         | 17,2 | 21,5 | 17                   | 1,1             | 0,5                     |
| 2.a Identificar las situaciones clínicas en las que no está indicado prescribir antibióticos                                                                                  | 0,5                        | 1,6                      | 7,5  | 20,4 | 27,7                         | 20,9 | 13,2 | 7,3                  | 0,2             | 0,2                     |
| 2.b. Diferenciar entre colonización bacteriana e infección                                                                                                                    | 0                          | 2                        | 4,5  | 15   | 24,7                         | 18,6 | 18,1 | 16,1                 | 0,7             | 0                       |
| 2.c Diferenciar entre etiología bacteriana o viral en las infecciones de vía area superior                                                                                    | 0,2                        | 1,8                      | 4,8  | 11,3 | 21,1                         | 16,3 | 24,7 | 18,8                 | 0,2             | 0                       |
| 3.a Seleccionar el tratamiento empírico inicia sin usar guías, teniendo en cuenta los patógenos más frecuentes y sus resistencias.                                            | 0,2                        | 13,4                     | 19   | 25,6 | 18,1                         | 9,8  | 7,7  | 4,8                  | 0,2             | 0,2                     |
| 3.b Decidir cuál es la urgencia de tratamiento antibiótico en diferentes situaciones (p.ej. <1 hora para sepsis grave o shock séptico, sin prisa para infecciones óseas)      | 1,6                        | 10,7                     | 15,6 | 23,1 | 20                           | 13,2 | 10   | 5                    | 0,5             | 0                       |
| 3.c Prescribir antibióticos de acuerdo con las guías locales/nacionales                                                                                                       | 2,5                        | 13,2                     | 15,2 | 23,8 | 19,3                         | 11,8 | 9,1  | 3,4                  | 0,7             | 0,5                     |
| 3.d Evaluar las alergias antibióticas (diferenciar entre anafilaxia e hipersensibilidad)                                                                                      | 2,7                        | 8,6                      | 14,3 | 18,8 | 20,6                         | 15   | 11,1 | 7,9                  | 2,7             | 0                       |
| 3.e Identificar las situaciones en las que está indicado usar varios antibióticos en combinación                                                                              | 2                          | 17,7                     | 16,3 | 24,5 | 16,6                         | 13,2 | 7,3  | 1,6                  | 0,2             | 0,2                     |
| 3.f Decidir la duración adecuada más corta para una indicación específica                                                                                                     | 2,3                        | 19                       | 20   | 23,6 | 17,5                         | 9,1  | 5,2  | 2,5                  | 0,2             | 0                       |
| 3.g Prescribir de acuerdo a los principios de profilaxis quirúrgica                                                                                                           | 2,9                        | 11,8                     | 15,6 | 22   | 21,1                         | 14,3 | 7,9  | 2,9                  | 0,7             | 0                       |
| 4.a Replantear la necesidad de continuar o cambiar la terapia antibiótica tras 48-72 h basándote en la evolución y resultados de laboratorio.                                 | 2,3                        | 7,9                      | 13,4 | 19,7 | 28,1                         | 11,3 | 11,1 | 5                    | 0,9             | 0,2                     |
| 4.b Evaluar la respuesta clínica y las posibles razones de fracaso del tratamiento antibiótico                                                                                | 2,3                        | 7,7                      | 10,7 | 23,4 | 27,9                         | 16,3 | 7,5  | 3,4                  | 0,5             | 0,2                     |
| 4.c Decidir cuándo pasar de vía intravenosa a vía oral                                                                                                                        | 3,4                        | 8,8                      | 15,2 | 21,8 | 19,5                         | 15,6 | 11,1 | 4,1                  | 0,5             | 0                       |
| 5.a Trabajar con/colaborar con equipos multidisciplinares para el manejo de antibióticos en hospitales                                                                        | 5,7                        | 10,7                     | 12,9 | 18,4 | 24,9                         | 9,8  | 9,5  | 4,8                  | 2               | 0,7                     |
| 5.b Medir el consumo de antibióticos/evaluar su uso en un entorno clínico e interpretar los resultados                                                                        | 7,5                        | 8,6                      | 10,9 | 23,8 | 23,1                         | 7,9  | 5,7  | 2,9                  | 2,9             | 5,9                     |
| 6.a Comunicar con los adjuntos las situaciones en las que creo que el antibiótico no está inadecuado, pero me siento inapropiadamente presionado por ellos para prescribirlos | 10,4                       | 7,9                      | 10,9 | 18,1 | 23,1                         | 12,2 | 10,2 | 4,5                  | 1,4             | 0,7                     |
| 6.b Discutir con el paciente el uso de antibióticos cuando creo que no son necesarios y él/ella los pide                                                                      | 3,6                        | 2                        | 3,9  | 10,2 | 23,8                         | 17,5 | 18,8 | 19,7                 | 0,5             | 0                       |
| 7.a Aplicar de una manera eficaz los principios de higiene y prevención de la transmisión de las enf. infecciosas                                                             | 0,2                        | 1,6                      | 4,3  | 7,7  | 20                           | 13,6 | 21,8 | 29                   | 0,7             | 0,5                     |
| 7.b Aplicar los conocimientos en los mecanismos comunes de resistencia antibiótica en los distintos patógenos                                                                 | 0,2                        | 5,4                      | 11,1 | 18,8 | 28,8                         | 14,7 | 12,5 | 7                    | 0,9             | 0,2                     |
| 7.c Usar el conocimiento en epidemiología de la resistencia bacteriana, incluyendo variaciones locales/regionales                                                             | 1,1                        | 10,2                     | 19   | 24,3 | 20,4                         | 12   | 7,9  | 4,1                  | 0,2             | 0,5                     |
| c.7. Aplicar tus conocimientos sobre las consecuencias negativas del tratamiento antibiótico (resistencia, toxicidad directa, Clostridium difficile)                          | 0,2                        | 1,8                      | 4,1  | 7,9  | 15                           | 13,8 | 22   | 33,3                 | 0,7             | 0,7                     |

**Material suplementario 2:** Todas las respuestas de la encuesta STUDENT-PREPARE
